# Supplementary material for: Nickel, copper, and zinc centered ruthenium-substituted porphyrins: effect of transition metals on photoinduced DNA cleavage and photoinduced melanoma cell toxicity
Source: Royal Society of Chemistry journal article supplement (doi:10.1039/c2dt12331b), 2012-01-01

### Gel electrophoresis of free base porphyrin, I, with plasmid DNA

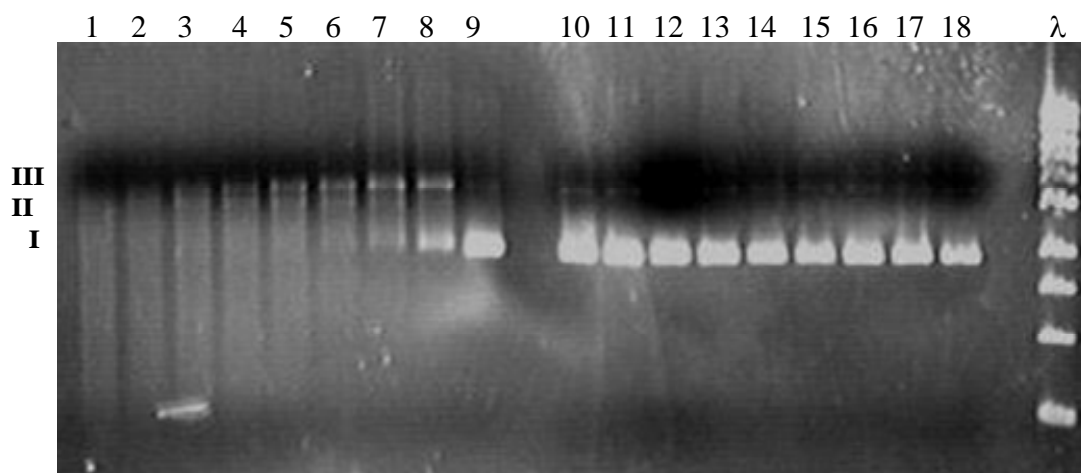

Gel electrophoresis of circular plasmid DNA (pUC18) in the presence of complex I at a ratio of 100 base pairs/metal complex (lanes 1-9) and without complex I (lanes 10-18) and molecular weight standard  $\lambda$ . Samples were irradiated with a 100 W mercury arc lamp equipped with a long pass filter cutting off wavelengths below 400 nm. Samples were taken at 2 minute intervals.

Cell studies of nickel/ruthenium porphyrin, **II**.

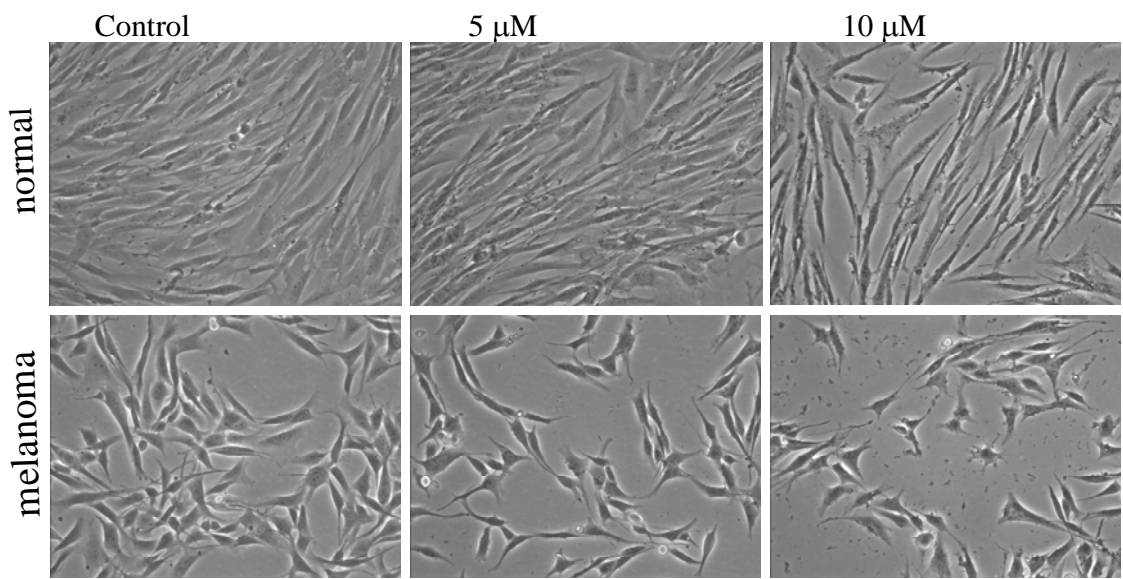

Supplement: c2dt12331b.pdf [file c2dt12331b.pdf]
